1  
2  
3  
4  
5  
6  
7  
8  
9  
10  
11  
12  
13  
14  
15  
16  
17  
18  
19  
20  
21  
22  
23  
24  
25  
26  
27  
28  
29  
30  
31  
32  
33

# Effects of learning and escitalopram administration on serum BDNF levels, a randomised placebo-controlled trial

Running heading: "Effects of learning and escitalopram on sBDNF levels"

Unterholzner J<sup>#1</sup>, Godbersen GM<sup>#1</sup>, Klöbl M<sup>1</sup>, Ritter V<sup>1</sup>, Pacher D<sup>1</sup>, Seiger R<sup>1</sup>, Varghese N<sup>2</sup>, Eckert A<sup>2</sup>,  
Lanzenberger R<sup>1</sup>, Vanicek T<sup>1</sup> (#contributed equally)

<sup>1</sup>*Department of Psychiatry and Psychotherapy, Medical University of Vienna, Austria*  
<sup>2</sup>*Neurobiology Lab for Brain Aging and Mental Health, Transfaculty Research Platform Molecular & Cognitive Neuroscience (MCN), University of Basel, Switzerland*

For submission to  
**bioRxiv**

|                       |      |
|-----------------------|------|
| # of pages            | 22   |
| # of figures          | 2    |
| # of words abstract   | 233  |
| # of words manuscript | 2687 |

\*Correspondence to:  
Prof. Rupert Lanzenberger, MD, PD  
Email: [rupert.lanzenberger@meduniwien.ac.at](mailto:rupert.lanzenberger@meduniwien.ac.at)  
Department of Psychiatry and Psychotherapy, Medical University of Vienna, Austria

## 34 Abstract

### 35 Background

36 The brain-derived neurotrophic factor (BDNF) has been implicated in processes essential for  
37 neuroplasticity. Learning and serotonin reuptake inhibitors (SSRI) foster neuronal reorganization, a  
38 mechanism potentially related to BDNF. This study aims to assess the effects of associative learning and  
39 escitalopram on serum BDNF (sBDNF) levels, to gain further knowledge on their dynamic interplay.

### 40 Methods

41 For three weeks, 37 participants performed one of two associative learning paradigms with either  
42 emotional or semantic content daily. During a subsequent three-week period of reversal learning, subjects  
43 either received escitalopram (10mg per day) or placebo. Before and after each learning period sBDNF  
44 values were assessed. Citalopram plasma levels were measured at the last time point. Linear mixed effects  
45 models (LME) and partial Spearman's rank and Pearson correlations were used for statistical analyses.

### 46 Results

47 One-way LME resulted in a significant effect of time during the first learning period over both groups  
48 ( $p < 0.01$ ). Two-way LME revealed a significant interaction effect of the emotional content learning group  
49 and time ( $p = 0.02$ ). Three-way LME (time x reversal learning group x substance) showed no significant  
50 effects (all  $p > 0.05$ ). Furthermore, correlation between citalopram and sBDNF level after three weeks of  
51 escitalopram administration exhibit a negative trend (partial Pearson correlation:  $r = -0.30$ ,  $p = 0.05$ ; partial  
52 Spearman's rank:  $r = -0.22$ ,  $p = 0.15$ ).

### 53 Conclusion

54 The results suggest that three weeks of associative emotional content learning affect sBDNF levels, while  
55 subsequently assessed citalopram plasma and sBDNF levels tend to correlate negatively.

## 56 Key Points

57 • Emotional learning may affect serum BDNF levels in healthy human subjects

58 • Blood levels of citalopram and serum BDNF exhibit a negative correlation

59

## 60 1. Introduction

61 The brain-derived neurotrophic factor (BDNF) is a protein of the neurotrophin family that has been  
62 implicated in neuroplastic processes and linked with brain disorders[1]. Due to its effects on neuronal  
63 differentiation, axon-dendrite growth and guidance, synapse formation and the modulation of neuronal  
64 activation[2], BDNF could also be proposed as a surrogate marker for neuroplasticity. The neurotrophin is  
65 highly expressed in the central nervous system (CNS), particularly in the hippocampus, but it can be  
66 determined in blood, as well. While the exact origin of circulating BDNF outside of the central nervous  
67 system is not yet fully understood[3], current evidence suggests that BDNF can be transported through  
68 the blood-brain barrier[4]. BDNF concentrations in the brain, particularly in the prefrontal cortex and  
69 hippocampus[5], are linked with BDNF serum levels. Also, peripherally administered BDNF elicits changes  
70 in the CNS, suggesting that it might be relevant for brain metabolism and function.

71 Through its neuroplastic properties, BDNF has repeatedly been associated with learning. For example,  
72 BDNF expression positively influences spatial memory in mice[6, 7] and contributes to long-term  
73 potentiation (LTP), a process that is critical for memory consolidation and learning[2]. Moreover, levels of  
74 BDNF appear to decline with hippocampal volume and memory[8] and BDNF seems to be especially  
75 relevant for hippocampal-dependent learning[9].

76 Increasing evidence suggests that BDNF and neuroplastic mechanisms can also be influenced through  
77 selective serotonin reuptake inhibitors (SSRIs)[10]. Chronic SSRI administration activates cAMP-response  
78 element binding protein (CREB), a transcription factor, which in turn favours synaptic restructuring. Since  
79 the BDNF gene has a cAMP-response element, SSRIs might thus influence BDNF expression through  
80 activation of CREB[11]. BDNF also unfolds its effect via the tropomyosin-related kinase B (TrkB) receptor  
81 and downstream signalling cascades[2]. Recently, the group around Eero Castrén reported that the SSRI  
82 fluoxetine increased the accessibility of TrkB for BDNF by directly binding to the TrkB transmembrane

83 domain[12]. The authors remark that clinical response to an antidepressant requires high enough brain  
84 concentrations to bind TrkB, which is understood to present a low-affinity target for serotonergic agents.  
85 SSRIs influence mood[13] and motor function after ischemic stroke[14] and affect fear extinction  
86 learning[15] as well as contingency learning[16], all of which might be ascribed to the modulation of  
87 neuroplastic processes involving BDNF and TrkB. Interestingly, administration of BDNF alone also  
88 influences fear extinction[17]. If, in turn, BDNF can be influenced by learning alone has yet to be  
89 investigated in healthy human subjects. Moreover, given the molecular foundation, one might expect a  
90 change of central, but also peripheral BDNF levels through chronic SSRI administration. However, data on  
91 this topic are still scarce.

92 To unravel this dynamic interplay between learning, chronic SSRI administration and peripheral BDNF  
93 levels in healthy humans, we performed an intervention-study using an associative learning task and a  
94 subsequent associative relearning period with concomitant daily administration of either placebo or SSRI.  
95 We aimed to investigate, i) if sBDNF levels change dependent on different learning groups  
96 (emotional/semantic content) over time, ii) if there is an effect of SSRI administration and associative  
97 reversal learning on sBDNF levels over time and iii) if there is a correlation between sBDNF levels and  
98 citalopram plasma levels.

## 99 2. Material and Methods

### 100 Study design

101 This present analysis is part of a larger randomized placebo-controlled, double-blinded intervention study  
102 in healthy human subjects, approved by the ethics committee of the Medical University of Vienna (EK Nr.:  
103 1739/2016). It has been performed in accordance with the Declaration of Helsinki (1964). The project is  
104 registered at [clinicaltrials.gov](https://clinicaltrials.gov) with the identifier NCT02753738.

105 After recruitment and inclusion, subjects were randomly assigned to one of two groups for associative  
106 learning, either with emotional (face pairs) or semantic content (Chinese characters and unrelated German  
107 nouns). At three time points, serum levels of BDNF were assessed: at baseline (m1), after a period of  
108 associative learning (m2) and again after a period of associative reversal learning (m3). Before the  
109 associative reversal learning period, subjects were randomly assigned to one of two substance groups,  
110 either 10mg of escitalopram (SSRI) daily, or a daily intake of placebo drug (see Fig 1). Both, participants  
111 and research staff were blinded for substance group. Additionally, citalopram plasma levels were assessed  
112 during the three-week study drug administration and at time point m3.

## STUDY DESIGN

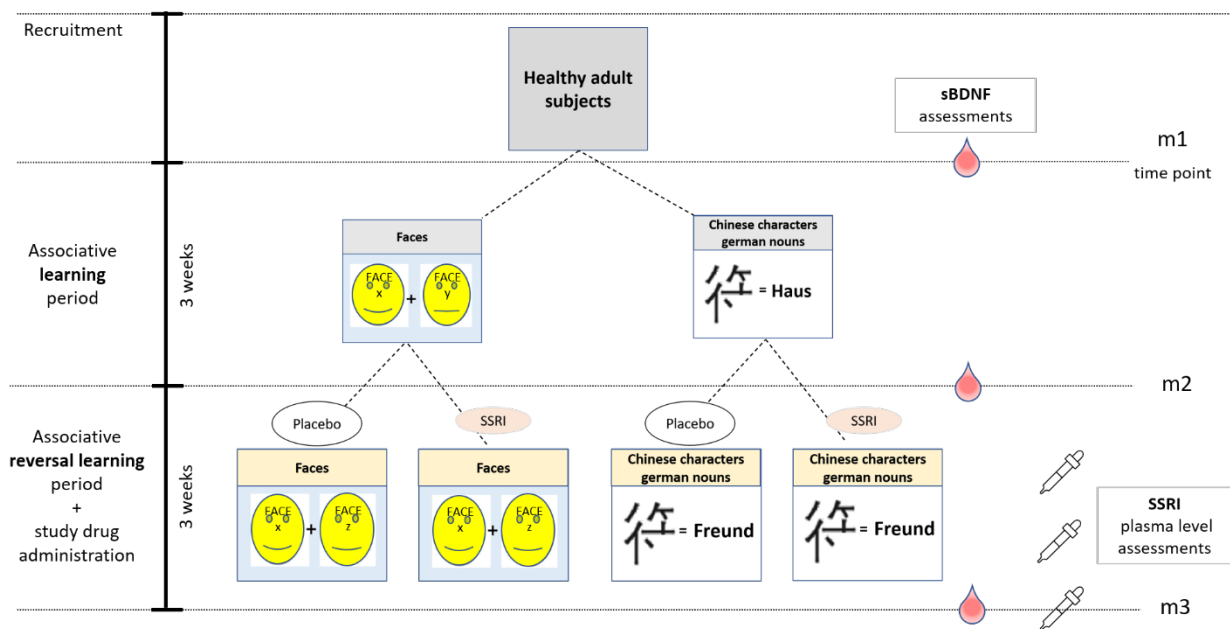

113  
114 **Figure 1 Study design.** After inclusion, subjects were randomly assigned to one of two learning paradigm groups, either association  
115 of face pairs (emotional content group) or association of Chinese characters to unrelated German nouns (semantic content group).  
116 After a period of three weeks with daily learning, each group was again randomly split into a placebo group and an SSRI group  
117 (10mg escitalopram orally per day). Subsequently, all four groups underwent another three weeks of associative reversal learning,  
118 where either face pairs or characters/nouns had changed. Serum levels of BDNF were assessed at three time points: before (m1)  
119 and after the three-week associative learning period (m2), as well as after the three-week reversal learning period (m3).  
120 Additionally, citalopram plasma levels were assessed 7, 12 and 21 days after beginning of administration; at m3 SSRI level and  
121 BDNF levels were assessed simultaneously.  
122

## 123 Subjects

124 Data from 37 healthy, non-related adult subjects were included into the analysis (mean age  $\pm$  SD: 25.92  $\pm$   
125 4.97 years, 20 females, 17 males). General health was assessed by means of medical history, physical  
126 examination, electrocardiography and blood sampling. To screen for psychiatric health, a structured  
127 clinical interview for DSM-IV (SCID) was conducted. Moreover, inclusion criteria were willingness and  
128 competence to participate in the study, age between 18 to 55 years and non-smoking status. Exclusion  
129 criteria comprised medical, psychiatric, or neurological illnesses, a lifetime use of SSRIs, first degree  
130 relatives with a history of psychiatric illness, colour blindness, non-Caucasian ancestry (self-reported) and  
131 knowledge of Kanji or Hanzi (Japanese or Chinese characters). All subjects gave written informed consent  
132 and received reimbursement for their participation.

## 133 Associative learning paradigms

134 Associative learning comprised memorising either two faces to one another or Chinese characters to  
135 unrelated German nouns. Faces for the emotional content learning group were taken from the “10k Adult  
136 Faces Database”[18]. Chinese characters for the semantic content learning group were randomly selected  
137 and had no meaning or connection to the associated words. Per day, 52 images pseudo-randomly selected  
138 out of 200 pairs were presented to the subjects at an online platform that was developed in house. Each  
139 image was presented for 5 seconds. Each session was followed by a retrieval. From the subset of all  
140 previously learnt associations one half of the random pairs was shown, while the correct association had  
141 to be chosen from four possible answers with unlimited time. Subjects did not receive any feedback on  
142 their learning performance.

## 143 Assessment of serum BDNF levels

144 Serum BDNF levels were measured from peripheral venous blood samples. Samples were collected in  
145 serum vacutainer tubes (Becton Dickinson). Subsequently, tubes were centrifuged at 1500 x g for 15 min.

146 The liquid portions were pipetted and stored at -80°C before analysis of sBDNF levels. Assessment of  
147 sBDNF levels was performed using an ELISA (enzyme-linked immunosorbent assay) kit (Biosensis® Mature  
148 BDNF Rapid™ ELISA Kit: Human, Mouse, Rat; Thebarton, SA, Australia). As described in the manufacturer's  
149 protocol, serum samples were appropriately diluted (1:100) and BDNF was detected on pre-coated mouse  
150 monoclonal anti-mature BDNF 96-well plates. Within five minutes after addition of stop solution,  
151 absorbance was measured in a microplate reader set at 450 nm and a correction wavelength set to 690  
152 nm to determine BDNF concentrations according to the standard curve. The assays were performed in  
153 duplicate and the mean of both was calculated. For analysis of intrinsic assay quality, intra- and inter-assay  
154 coefficients of variation (CV) were assessed.

### 155 Study drug administration and assessment of SSRI plasma levels

156 For 21 days, subjects received either a placebo or 10mg escitalopram (Ciprallex® Lundbeck A/S, provided  
157 by the Pharmaceutical Department of the Medical University of Vienna) per day. With escitalopram we  
158 chose a study drug that has a specific effect on the serotonergic system by selectively binding to the  
159 transporter. Escitalopram possesses an adequate tolerability and dose-dependent mild and temporary  
160 adverse events[19]. Previous studies had already shown its tolerability in healthy volunteers when  
161 administered longitudinally[20]. Plasma levels for escitalopram can be detected from citalopram plasma  
162 levels since the latter contains both, S- and R-citalopram. Venous blood samples were drawn 7, 14 and 21  
163 days after administration onset. Plasma levels were measured at the Clinical Department of Laboratory  
164 Medicine of the Medical University of Vienna using liquid chromatography–tandem mass spectrometry  
165 (LC-MS/MS). For citalopram the therapeutic reference range is 50-110 ng/ml, for escitalopram (S-  
166 citalopram) the reference range is 15-80 ng/ml[21].

### 167 Statistics

168 To assess the effects of learning and SSRI administration on sBDNF levels, linear mixed effects models  
169 (LMEs) were used. The learning (m1 and m2) and relearning phases (m2 and m3) were analysed separately.



170 For the learning model, “group” (characters / faces) and “measurement” (m1 / m2) were included as  
171 factors. The relearning model contained an additional “substance” factor (placebo / escitalopram).  
172 Interactions between these factors were assessed and dropped if not significant. “Age” (mean-centred)  
173 and “sex” were always added as covariates. A second relearning model additionally corrected for the final  
174 citalopram plasma levels (mean-centred) was also constructed. All models contained a random intercept  
175 per subject. A random “measurement” slope per subject was added only if it increased the model quality  
176 (as indicated by the Akaike information criterion). All factors were reference coded as follows, for the  
177 learning model m1, and for the reversal learning m2 was used as reference measurement. For the other  
178 factors, Chinese character and placebo groups were used as references. Finally, to test for an association  
179 between sBDNF values and SSRI plasma levels, partial Pearson correlation was performed, controlled for  
180 “age”, “sex” and “group”. Additionally, partial Spearman was performed, to account for outlying values.  
181 For all analyses, alpha threshold of significance was set at  $p < 0.05$ . Calculations were performed using  
182 MATLAB 2018b.

### 183 3. Results

#### 184 Subgroups

185 Data from 37 subjects were included in the final analysis. For group sizes see table 1.

#### 186 sBDNF levels at baseline and during the study

187 At the first measurement (m1), mean sBDNF levels for all subjects were  $26.34 \pm 7.24$  ng/ml (mean  $\pm$  SD),  
188 followed by  $33.40 \pm 7.42$  ng/ml at the second measurement (m2), and  $31.10 \pm 8.19$  ng/ml at the third  
189 measurement (m3), see table 1.

190

191

| ID     | Sex           | Age   | Group          | Substance      | m3 SSRI level (ng/ml) | m1 sBDNF (ng/ml) | m2 sBDNF (ng/ml) | m3 sBDNF (ng/ml) |
|--------|---------------|-------|----------------|----------------|-----------------------|------------------|------------------|------------------|
| 1      | female        | 28    | faces          | verum          | NA                    | 7.232            | 35.069           | NA               |
| 2      | female        | 21    | faces          | verum          | 25.00                 | 20.750           | 22.013           | 35.765           |
| 3      | male          | 19    | faces          | verum          | -                     | 14.780           | NA               | 13.291           |
| 4      | female        | 24    | Chinese        | verum          | 29.80                 | NA               | 33.963           | 29.934           |
| 5      | male          | 23    | faces          | verum          | 39.70                 | 38.314           | 42.219           | 31.934           |
| 6      | male          | 33    | faces          | verum          | 18.70                 | 38.802           | 49.915           | 38.026           |
| 7      | male          | 30    | faces          | placebo        | -                     | 26.810           | 23.584           | NA               |
| 8      | male          | 28    | Chinese        | placebo        | -                     | 34.384           | 49.011           | 26.226           |
| 9      | female        | 36    | Chinese        | verum          | 18.50                 | 31.479           | 24.975           | 23.939           |
| 10     | female        | 30    | faces          | placebo        | -                     | 10.600           | NA               | 18.748           |
| 11     | male          | 25    | faces          | placebo        | -                     | 24.770           | 45.445           | 27.515           |
| 12     | male          | 22    | Chinese        | placebo        | -                     | 21.038           | 22.854           | 30.208           |
| 13     | male          | 23    | Chinese        | placebo        | -                     | 27.041           | 30.648           | 42.356           |
| 14     | male          | 27    | Chinese        | verum          | 19.10                 | 37.434           | 21.180           | 27.803           |
| 15     | female        | 32    | Chinese        | placebo        | -                     | 26.316           | 35.852           | 21.184           |
| 16     | male          | 22    | faces          | placebo        | -                     | 18.028           | 28.657           | 35.161           |
| 17     | female        | 26    | Chinese        | verum          | 15.50                 | 28.211           | 25.460           | 29.994           |
| 18     | male          | 27    | faces          | verum          | NA                    | 23.956           | 33.363           | NA               |
| 19     | female        | 20    | Chinese        | verum          | 25.70                 | 29.527           | 33.315           | 27.150           |
| 20     | female        | 21    | faces          | verum          | 38.40                 | 22.956           | 34.931           | 22.213           |
| 21     | male          | 23    | Chinese        | placebo        | -                     | 32.520           | 31.168           | 42.209           |
| 22     | female        | 30    | faces          | verum          | 39.80                 | 29.981           | 33.405           | NA               |
| 23     | female        | 28    | Chinese        | placebo        | -                     | 31.191           | 38.101           | 51.811           |
| 24     | male          | 21    | Chinese        | verum          | 16.00                 | 28.805           | 28.562           | 24.186           |
| 25     | female        | 22    | Chinese        | verum          | 13.60                 | 24.040           | 28.523           | 33.525           |
| 26     | male          | 22    | Chinese        | verum          | 20.70                 | 21.357           | 33.482           | 33.757           |
| 27     | male          | 24    | faces          | placebo        | -                     | 25.404           | 35.539           | NA               |
| 28     | female        | 26    | faces          | placebo        | -                     | 28.038           | 49.086           | 32.635           |
| 29     | male          | 26    | faces          | placebo        | -                     | 35.769           | 30.570           | NA               |
| 30     | female        | 26    | faces          | verum          | 11.10                 | 25.516           | 36.802           | 23.263           |
| 31     | female        | 45    | faces          | placebo        | -                     | 22.328           | 29.320           | 39.812           |
| 32     | female        | 23    | faces          | verum          | 10.40                 | 28.979           | 40.264           | 34.659           |
| 33     | male          | 27    | faces          | verum          | 13.50                 | 34.338           | 29.601           | 30.701           |
| 34     | female        | 26    | faces          | placebo        | -                     | 18.238           | 29.550           | 33.990           |
| 35     | female        | 23    | faces          | verum          | 13.10                 | 28.584           | 37.498           | 44.262           |
| 36     | female        | 24    | faces          | placebo        | -                     | 30.216           | 35.515           | NA               |
| 37     | female        | 26    | faces          | placebo        | -                     | 20.553           | 29.640           | 26.652           |
|        | female (n=20) |       | faces (n=23)   | verum (n=20)   |                       |                  |                  |                  |
|        | male (n=17)   |       | Chinese (n=14) | placebo (n=17) |                       |                  |                  |                  |
| Mean   |               | 25.92 |                |                | 21.68                 | 26.34            | 33.40            | 31.10            |
| Median |               | 26.00 |                |                | 18.70                 | 26.93            | 33.36            | 30.45            |
| SD     |               | 4.97  |                |                | 11.57                 | 7.24             | 7.42             | 8.19             |

192 **Table 1 Subjects, group assignments and acquired data.** The table lists the full data for the 37 subjects included in the analysis.  
 193 Values for mean plasma level, median and SD only refer to the verum group. Due to blinding, SSRI levels were also assessed in the  
 194 placebo group. Values below the detectability threshold were indicated as “-“. Two subjects (ID 1 and 18) dropped out before m3.  
 195 NA: not available, SD: standard deviation, sBDNF: serum brain-derived neurotrophic factor, SSRI: selective serotonin reuptake  
 196 inhibitor

197 **Effects of learning period and groups on sBDNF levels**

198 For the learning phase, a significant interaction between “measurement” and “group” was found ( $p = 0.02$ )  
 199 indicating a higher sBDNF level in the “faces” group at m2.

| Name       | Estimate | SE   | t-value | DF | p-value | 95% CI         |
|------------|----------|------|---------|----|---------|----------------|
| Intercept  | 30.14    | 2.09 | 14.45   | 65 | 0.00    | [25.97, 34.30] |
| m2         | 2.53     | 2.33 | 1.09    | 65 | 0.28    | [-2.12, 7.18]  |
| female     | -2.68    | 1.99 | -1.35   | 65 | 0.18    | [-6.64, 1.29]  |
| faces      | -3.67    | 2.33 | -1.58   | 65 | 0.12    | [-8.32, 0.97]  |
| age        | 0.16     | 0.20 | 0.80    | 65 | 0.43    | [-0.24, 0.56]  |
| m2 ~ faces | 6.88     | 2.97 | 2.32    | 65 | 0.02    | [0.96, 12.81]  |

200 **Table 2** LME results for interaction effects of learning period (m1 / m2) and groups (faces / Chinese) on sBDNF levels. DF: degrees  
 201 of freedom, CI: confidence interval, SE: standard error, m2: measurement 2, faces: emotional content learning group. Intercept  
 202 refers to male, m1 and character.

203 **Effects of substance and reversal learning paradigms on sBDNF levels**

204 No three-way interaction between “measurement”, “group” and “substance” was detected, independent  
 205 of a correction for the final citalopram levels. A “group-by-substance” interaction was found with ( $p = 0.03$ )  
 206 and without ( $p = 0.03$ ) the SSRI level as covariate. The covariate for the final citalopram levels was not  
 207 significant, which is also reflected in the similar p-values.

| Name          | Estimate | SE   | t-value | DF | p-value | 95% CI         |
|---------------|----------|------|---------|----|---------|----------------|
| Intercept     | 34.72    | 2.90 | 11.98   | 54 | 0.00    | [28.91, 40.53] |
| m3            | 0.89     | 3.51 | 0.25    | 54 | 0.80    | [-6.16, 7.93]  |
| female        | -0.07    | 2.03 | -0.04   | 54 | 0.97    | [-4.14, 4.00]  |
| faces         | -1.08    | 3.42 | -0.32   | 54 | 0.75    | [-7.94, 5.78]  |
| verum         | -6.12    | 3.56 | -1.72   | 54 | 0.09    | [-13.27, 1.03] |
| age           | -0.01    | 0.20 | -0.05   | 54 | 0.96    | [-0.41, 0.39]  |
| SSRI level    | -0.05    | 0.15 | -0.32   | 54 | 0.75    | [-0.35, 0.26]  |
| m3 ~ faces    | -3.78    | 3.75 | -1.01   | 54 | 0.32    | [-11.30, 3.74] |
| m3 ~ verum    | -0.65    | 3.76 | -0.17   | 54 | 0.86    | [-8.18, 6.88]  |
| faces ~ verum | 8.57     | 3.96 | 2.17    | 54 | 0.03    | [0.64, 16.50]  |

208 **Table 3** LME results for interaction effects of substance (verum / placebo) and reversal learning (faces / Chinese) on sBDNF levels.  
 209 DF: degrees of freedom, CI: confidence interval, SE: standard error, m2: measurement 2, faces: emotional content learning group.  
 210 Intercept refers to male, m2, character and placebo.

211 Correlation between sBDNF levels and SSRI plasma level after three weeks of SSRI  
212 administration

213 Partial Pearson correlation ( $r=-0.30$ ,  $p=0.05$ ) revealed a negative association between SSRI and sBDNF level  
214 after three weeks of escitalopram administration and relearning. Partial Spearman correlation also  
215 showed a negative, albeit less pronounced, dependency ( $r=-0.22$ ,  $p=0.15$ ) (Figure 2).

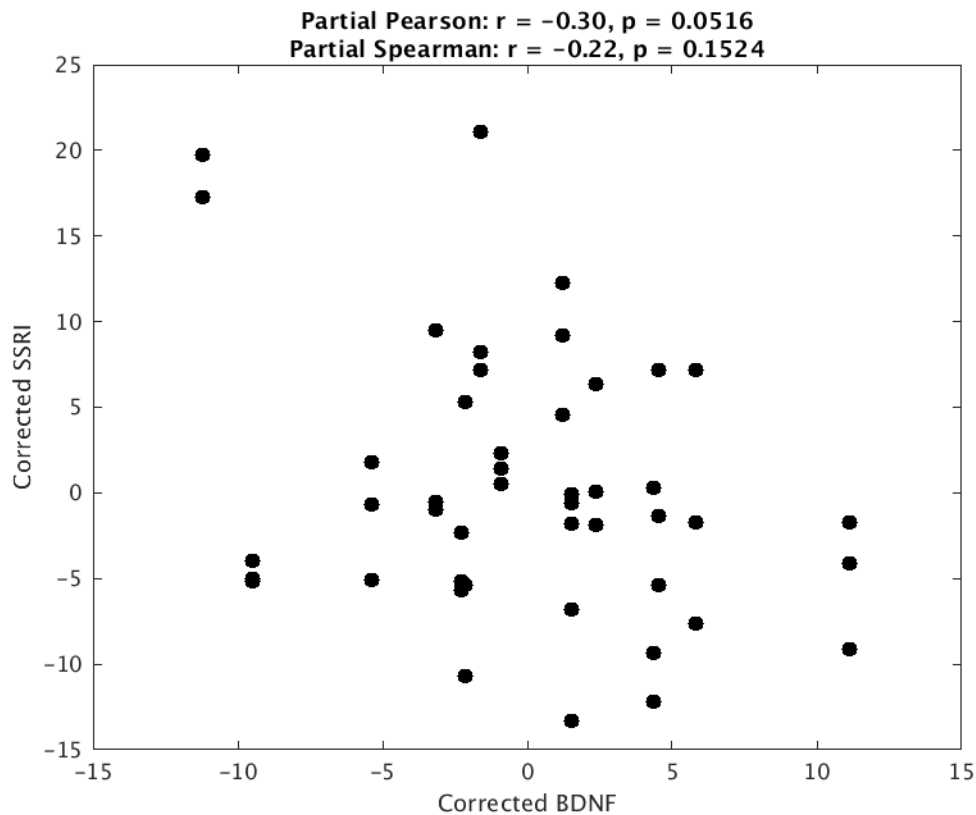

216

217 **Figure 2** Correlation of sBDNF and SSRI plasma levels at the end of the relearning phase. Partial Pearson correlation of sBDNF and  
218 SSRI level, controlled for age, sex and group, indicates a significant negative correlation after a three-week period of daily  
219 escitalopram administration (10 mg) and the concomitant associative reversal learning period. Partial Spearman's rank correlation  
220 does not reach significance. sBDNF – serum brain-derived neurotrophic factor, SSRI- selective serotonin reuptake inhibitor

221

## 222 4. Discussion

223 In this randomised, double blinded longitudinal intervention study we aimed to investigate the effect of  
224 associative learning and reversal learning in combination with three-week daily escitalopram intake on  
225 serum BDNF levels in healthy human subjects. Learning face pairs as compared to associations between  
226 Chinese characters and unrelated German nouns lead to a stronger increase in sBDNF.

227 Learning tasks as those employed here were shown to activate predominantly hippocampal and  
228 parahippocampal regions[22, 23]. To increase activation of limbic regions, including the hippocampus,  
229 emotional content was added to our learning tasks[24, 25]. In mice, BDNF seems to be necessary for  
230 specific learning tasks that implicate the hippocampus[9]. Studies on BDNF and learning in healthy  
231 subjects, however, are scarce. The association of peripheral BDNF with cognitive functioning is often  
232 investigated in combination with physical activity[26], where BDNF serves as a marker of plasticity.  
233 Moreover, while BDNF levels seem to correlate with better memory performance, no difference was found  
234 through repeated cognitive training. As an explanation, it was suggested that higher cognitive performance  
235 might require higher BDNF levels[27]. According to the *synaptic tag* hypothesis[28], BDNF might represent  
236 a plasticity-related protein that is already induced by a weak behavioural training task. This could be  
237 represented by the increase in BDNF levels we see in our model in the initial associative learning phase.  
238 Moreover, the effect of our emotional content learning paradigm on sBDNF levels could resemble the  
239 requirement for BDNF in the hippocampus during the period of emotional learning. BDNF was shown to  
240 be influenced by (treatment) interventions such as electroconvulsive therapy[29, 30] and SSRI  
241 administration[10]. Treatment with fluoxetine leads to elevated levels of BDNF mRNA in the mouse  
242 hippocampus, however, only in combination with fear extinction training[31]. Since habituation also  
243 represents a learning phenomenon[32], it can be conceived that our reversal learning task might have  
244 been accompanied with too little novelty to induce further changes of peripheral BDNF levels, despite the  
245 potentially modulating effect of chronic SSRI administration[12].

246 The correlation of peripheral BDNF and SSRI levels continues to be a matter of debate. In our study, we  
247 observed a trend towards a negative correlation of sBDNF and plasma citalopram levels at the end of the  
248 three-week drug administration. Given the magnitude of the effect and the non-significance of the  
249 correlations, this result can only be an indication of a possible relationship. Meta-analytical findings point  
250 towards an increase in peripheral BDNF levels through antidepressant treatment in patients with  
251 depression[10]. Also, BDNF levels were shown to be lower in therapy-naïve patients than in patients with  
252 depression treated with antidepressants, or in healthy control[33]. Accordingly, post-mortem studies find  
253 higher cortical BDNF expression in SSRI-treated than in untreated depressed patients[34]. Moreover, an  
254 increase of BDNF through chronic SSRI administration in the visual cortex and hippocampus of the rat was  
255 shown[35]. One proposed mechanism for the effect of SSRIs is an upregulation of CREB mRNA in the  
256 hippocampus and subsequently an increased expression of BDNF and TrkB[36].

257 Knorr et al. have been, until now, the only group to investigate the effect of chronic escitalopram  
258 administration on whole blood BDNF levels in healthy subjects[20]. They reported a significant negative  
259 correlation between citalopram and whole blood BDNF levels. In line with their results, escitalopram was  
260 shown to lead to a decrease of BDNF protein in the rat hippocampus and frontal cortex, while not affecting  
261 BDNF mRNA expression in these regions[37]. Further, a decrease of BDNF mRNA in the dental gyrus of rats  
262 was demonstrated, which was induced separately by various serotonergic agents including paroxetine,  
263 tranylcypromine, and *p*-chlorophenylalanine[38]. Our results seem to mirror these findings, reflecting  
264 those central processes in the periphery. Most importantly, as one of only a few studies, our data allows  
265 for the direct correlation of drug levels (in this case citalopram) and peripheral BDNF levels, instead of  
266 investigating BDNF levels over a treatment period alone. A molecular mechanism for the negative  
267 correlation between citalopram plasma levels and BDNF serum levels, however, is missing. The reduction  
268 of peripheral BDNF levels with increasing escitalopram levels might be an indication of increased binding  
269 of BDNF with a greater TrkB receptor accessibility enabled through the SSRI[12].

270 Five subjects had a citalopram level beneath the therapeutic reference range. Notwithstanding, a plasma  
271 concentration of 2.5 ng/ml citalopram was shown to result in a serotonin transporter occupancy in the  
272 midbrain of 50%[39]. In a PET study, our group has shown strong correlations of serotonin transporter  
273 occupancy and escitalopram plasma levels after a drug administration of three weeks[40]. Consequently,  
274 effects of chronic drug intake on brain metabolism and cognitive functions could be expected according  
275 to our citalopram plasma concentrations.

## 276 5. Limitations

277 To differentiate between effects of learning and no intervention in general, it would have been beneficial  
278 to include an additional non-learning control group. Also, numerous factors affecting sBDNF levels were  
279 not accounted for in this study, e.g. physical activity or seasonal variations[41, 42]. Here, a systematic  
280 survey of the most important influencing factors would have been beneficial. It should also be mentioned  
281 that some subjects exhibited a citalopram plasma level below the therapeutic range. Although medication  
282 adherence was controlled using therapeutic drug monitoring[43], it is not possible to definitively evaluate  
283 whether this variation is solely attributable to study drug adherence or also to rapid/slow metabolism.  
284 Moreover, the dosage, length of drug administration[10] as well as learning duration[44] might be  
285 reconsidered in future studies.

## 286 6. Conclusion

287 This study assessed the effects of associative learning and SSRI administration (escitalopram) on serum  
288 levels of BDNF, a neurotrophic factor involved in neuroplasticity and prominent target for recent  
289 psychiatric research. Our results indicate a modulating influence of emotional compared to non-emotional  
290 learning content on BDNF. Furthermore, indications of a negative correlation between SSRI plasma levels  
291 and sBDNF were found. While the definite mechanism responsible for this relationship is still missing, the

292 findings present an additional piece of information in the current debate on the dynamic interplay of SSRIs,  
293 learning and peripheral BDNF.



## 294 Acknowledgements

295 We thank T. Stimpfl for SSRI plasma level analyses. Also, we wish to thank the team members as well as  
296 the medical students of the Neuroimaging Lab (NIL), headed by Prof. Lanzenberger, the corresponding  
297 author.

## 298 Declarations

### 299 (i) Funding

300 The analysis is part of a larger study that was supported by the Austrian Science Fund (FWF) grant number  
301 KLI 516 to R.L., the Medical Imaging Cluster of the Medical University of Vienna, and by the grant  
302 „Interdisciplinary translational brain research cluster (ITHC) with highfield MR" from the Federal Ministry  
303 of Science, Research and Economy (BMWFW), Austria. M. K. is recipient of a DOC-fellowship of the  
304 Austrian Academy of Sciences at the Department of Psychiatry and Psychotherapy, Medical University of  
305 Vienna. D.P. is supported by the MDPHD Excellence Program of the Medical University of Vienna.

### 306 (ii) Conflicts of Interest

307 There are no conflicts of interest to declare regarding the present study. R. Lanzenberger received travel  
308 grants and/or conference speaker honoraria within the last three years from Bruker BioSpin MR and Heel  
309 and has served as a consultant for Ono Pharmaceutical. He received investigator-initiated research funding  
310 from Siemens Healthcare regarding clinical research using PET/MR. He is a shareholder of the start-up  
311 company BM Health GmbH since 2019.

### 312 (iii) Availability of data and material

313 The full data can be made available upon request to the corresponding author.

314

315 (iv) Ethics approval

316 This study is part of a larger project that has been approved by the ethics committee of the Medical  
317 University of Vienna (EK Nr.: 1739/2016) and performed in accordance with the Declaration of Helsinki  
318 (1964). The project is registered at [clinicaltrials.gov](https://clinicaltrials.gov) with the identifier NCT02753738.

319 (v) Consent

320 All subjects provided written informed consent before inclusion into the study.

321 (vi) Author contributions

322 R. L., R.S. and T. V. designed the main study. M. K., J. U., G.M. G., T. V. established the study concept and  
323 data analysis. M. K. performed data analysis. J. U. and G. M. G. wrote the first draft of the document. V. R.  
324 and D. P. provided support in recruitment and data collection. N.V. and A. E. performed BDNF analysis. All  
325 authors contributed to and have approved the final manuscript.

326

## 327 Abbreviations

- 328 BDNF - brain derived neurotrophic factor
- 329 CNS – central nervous system
- 330 CV – coefficient of variation
- 331 CYP – cytochrome p 450 polymorphism
- 332 CREB - cAMP-response element binding protein
- 333 ECG – electrocardiograph
- 334 ELISA - enzyme-linked immunosorbent assay
- 335 ERK – extracellular signal-regulated kinases
- 336 LC-MS/MS - liquid chromatography–tandem mass spectrometry (LC-MS/MS)
- 337 LME - Linear mixed effects
- 338 LTP - long-term potentiation
- 339 MAPK – mitogen-activated proteinkinase
- 340 MAO – monoaminooxidase
- 341 mRNA – messenger ribonucleic acid
- 342 sBDNF - serum BDNF
- 343 SCID - structured clinical interview from DSM-IV
- 344 SSRI - serotonin reuptake inhibitors
- 345 TrkB - tropomyosin-related kinase B
- 346
- 347
- 348
- 349
- 350

## 351 References

- 352 1. Autry AE, Monteggia LM. Brain-derived neurotrophic factor and neuropsychiatric disorders.  
353 Pharmacological reviews. 2012 Apr;64(2):238-58.
- 354 2. Park H, Poo M-m. Neurotrophin regulation of neural circuit development and function. Nature  
355 Reviews Neuroscience. 2013 2013/01/01;14(1):7-23.
- 356 3. Brigadski T, Leßmann V. The physiology of regulated BDNF release. Cell and Tissue Research. 2020  
357 2020/10/01;382(1):15-45.
- 358 4. Seifert T, Brassard P, Wissenberg M, Rasmussen P, Nordby P, Stallknecht B, et al. Endurance  
359 training enhances BDNF release from the human brain. American journal of physiology Regulatory,  
360 integrative and comparative physiology. 2010 Feb;298(2):R372-7.
- 361 5. Sartorius A, Hellweg R, Litzke J, Vogt M, Dormann C, Vollmayr B, et al. Correlations and  
362 Discrepancies between Serum and Brain Tissue Levels of Neurotrophins after Electroconvulsive Treatment  
363 in Rats. Pharmacopsychiatry. 2009 //18.11.2009;42(06):270-6.
- 364 6. Rex CS, Lauterborn JC, Lin C-Y, Kramár EA, Rogers GA, Gall CM, et al. Restoration of Long-Term  
365 Potentiation in Middle-Aged Hippocampus After Induction of Brain-Derived Neurotrophic Factor. Journal  
366 of Neurophysiology. 2006 2006/08/01;96(2):677-85.
- 367 7. Simmons DA, Rex CS, Palmer L, Pandeyarajan V, Fedulov V, Gall CM, et al. Up-regulating BDNF with  
368 an ampakine rescues synaptic plasticity and memory in Huntington's disease knockin mice. Proceedings of  
369 the National Academy of Sciences. 2009;106(12):4906.
- 370 8. Erickson KI, Prakash RS, Voss MW, Chaddock L, Heo S, McLaren M, et al. Brain-derived  
371 neurotrophic factor is associated with age-related decline in hippocampal volume. The Journal of  
372 neuroscience : the official journal of the Society for Neuroscience. 2010 Apr 14;30(15):5368-75.
- 373 9. Aarse J, Herlitze S, Manahan-Vaughan D. The requirement of BDNF for hippocampal synaptic  
374 plasticity is experience-dependent. Hippocampus. 2016 Jun;26(6):739-51.
- 375 10. Zhou C, Zhong J, Zou B, Fang L, Chen J, Deng X, et al. Meta-analyses of comparative efficacy of  
376 antidepressant medications on peripheral BDNF concentration in patients with depression. PloS one.  
377 2017;12(2):e0172270.
- 378 11. Tao X, Finkbeiner S, Arnold DB, Shaywitz AJ, Greenberg ME. Ca<sup>2+</sup> influx regulates BDNF  
379 transcription by a CREB family transcription factor-dependent mechanism. Neuron. 1998 Apr;20(4):709-  
380 26.
- 381 12. Casarotto PC, Girysh M, Fred SM, Kovaleva V, Moliner R, Enkavi G, et al. Antidepressant drugs act  
382 by directly binding to TRKB neurotrophin receptors. Cell. 2021 2021/02/18/.
- 383 13. Bauer M, Pfennig A, Severus E, Whybrow PC, Angst J, Möller HJ. World Federation of Societies of  
384 Biological Psychiatry (WFSBP) guidelines for biological treatment of unipolar depressive disorders, part 1:  
385 update 2013 on the acute and continuation treatment of unipolar depressive disorders. The world journal  
386 of biological psychiatry : the official journal of the World Federation of Societies of Biological Psychiatry.  
387 2013 Jul;14(5):334-85.
- 388 14. Chollet F, Tardy J, Albucher JF, Thalamas C, Berard E, Lamy C, et al. Fluoxetine for motor recovery  
389 after acute ischaemic stroke (FLAME): a randomised placebo-controlled trial. The Lancet Neurology. 2011  
390 Feb;10(2):123-30.
- 391 15. Bui E, Orr SP, Jacoby RJ, Keshaviah A, LeBlanc NJ, Milad MR, et al. Two weeks of pretreatment with  
392 escitalopram facilitates extinction learning in healthy individuals. Human psychopharmacology. 2013  
393 Sep;28(5):447-56.
- 394 16. Msetfi RM, Kumar P, Harmer CJ, Murphy RA. SSRI enhances sensitivity to background outcomes  
395 and modulates response rates: A randomized double blind study of instrumental action and depression.  
396 Neurobiology of learning and memory. 2016 May;131:76-82.

- 397 17. Radiske A, Rossato JI, Kohler CA, Gonzalez MC, Medina JH, Cammarota M. Requirement for BDNF  
398 in the reconsolidation of fear extinction. *The Journal of neuroscience : the official journal of the Society*  
399 *for Neuroscience*. 2015 Apr 22;35(16):6570-4.
- 400 18. Bainbridge W, Isola P, Blank I, Oliva A. Establishing a database for studying human face photograph  
401 memory. *Proceedings of the Annual Meeting of the Cognitive Science Society*; 2012; 2012.
- 402 19. Cipriani A, Furukawa TA, Salanti G, Chaimani A, Atkinson LZ, Ogawa Y, et al. Comparative efficacy  
403 and acceptability of 21 antidepressant drugs for the acute treatment of adults with major depressive  
404 disorder: a systematic review and network meta-analysis. *Lancet (London, England)*. 2018 Apr  
405 7;391(10128):1357-66.
- 406 20. Knorr U, Koefoed P, Soendergaard MH, Vinberg M, Gether U, Gluud C, et al. No effect of  
407 escitalopram versus placebo on brain-derived neurotrophic factor in healthy individuals: a randomised  
408 trial. *Acta neuropsychiatrica*. 2016 Apr;28(2):101-9.
- 409 21. Hiemke C, Baumann P, Bergemann N, Conca A, Dietmaier O, Egberts K, et al. AGNP Consensus  
410 Guidelines for Therapeutic Drug Monitoring in Psychiatry: Update 2011. *Pharmacopsychiatry*. 2011  
411 Sep;44(6):195-235.
- 412 22. Chua EF, Schacter DL, Rand-Giovannetti E, Sperling RA. Evidence for a specific role of the anterior  
413 hippocampal region in successful associative encoding. *Hippocampus*. 2007;17(11):1071-80.
- 414 23. Sperling RA, Bates JF, Cocchiarella AJ, Schacter DL, Rosen BR, Albert MS. Encoding novel face-name  
415 associations: a functional MRI study. *Human brain mapping*. 2001 Nov;14(3):129-39.
- 416 24. Knight DC, Waters NS, Bandettini PA. Neural substrates of explicit and implicit fear memory.  
417 *NeuroImage*. 2009 Mar;45(1):208-14.
- 418 25. Scheuerecker J, Frodl T, Koutsouleris N, Zetsche T, Wiesmann M, Kleemann AM, et al. Cerebral  
419 differences in explicit and implicit emotional processing - An fMRI study. *Neuropsychobiology*.  
420 2007;56(1):32-9.
- 421 26. Lippi G, Mattiuzzi C, Sanchis-Gomar F. Updated overview on interplay between physical exercise,  
422 neurotrophins, and cognitive function in humans. *Journal of sport and health science*. 2020 Jan;9(1):74-  
423 81.
- 424 27. Heisz JJ, Clark IB, Bonin K, Paolucci EM, Michalski B, Becker S, et al. The Effects of Physical Exercise  
425 and Cognitive Training on Memory and Neurotrophic Factors. *Journal of cognitive neuroscience*. 2017  
426 Nov;29(11):1895-907.
- 427 28. Frey S, Frey JU. 'Synaptic tagging' and 'cross-tagging' and related associative reinforcement  
428 processes of functional plasticity as the cellular basis for memory formation. *Progress in brain research*.  
429 2008;169:117-43.
- 430 29. Vanicek T, Kranz GS, Vyssoki B, Fugger G, Komorowski A, Hoflich A, et al. Acute and subsequent  
431 continuation electroconvulsive therapy elevates serum BDNF levels in patients with major depression.  
432 *Brain stimulation*. 2019 Jul - Aug;12(4):1041-50.
- 433 30. Vanicek T, Kranz GS, Vyssoki B, Komorowski A, Fugger G, Hoflich A, et al. Repetitive enhancement  
434 of serum BDNF subsequent to continuation ECT. *Acta psychiatrica Scandinavica*. 2019 Nov;140(5):426-34.
- 435 31. Karpova NN, Pickenhagen A, Lindholm J, Tiraboschi E, Kuleshkaya N, Agustsdottir A, et al. Fear  
436 erasure in mice requires synergy between antidepressant drugs and extinction training. *Science*. 2011 Dec  
437 23;334(6063):1731-4.
- 438 32. de Carvalho Myskiw J, Furini CR, Benetti F, Izquierdo I. Hippocampal molecular mechanisms  
439 involved in the enhancement of fear extinction caused by exposure to novelty. *Proceedings of the National*  
440 *Academy of Sciences of the United States of America*. 2014 Mar 25;111(12):4572-7.
- 441 33. Shimizu E, Hashimoto K, Okamura N, Koike K, Komatsu N, Kumakiri C, et al. Alterations of serum  
442 levels of brain-derived neurotrophic factor (BDNF) in depressed patients with or without antidepressants.  
443 *Biological psychiatry*. 2003 Jul 1;54(1):70-5.

- 444 34. Chen B, Dowlatshahi D, MacQueen GM, Wang JF, Young LT. Increased hippocampal BDNF  
445 immunoreactivity in subjects treated with antidepressant medication. *Biological psychiatry*. 2001 Aug  
446 15;50(4):260-5.
- 447 35. Maya Vetencourt JF, Sale A, Viegi A, Baroncelli L, De Pasquale R, O'Leary OF, et al. The  
448 antidepressant fluoxetine restores plasticity in the adult visual cortex. *Science*. 2008 Apr  
449 18;320(5874):385-8.
- 450 36. Nibuya M, Nestler EJ, Duman RS. Chronic antidepressant administration increases the expression  
451 of cAMP response element binding protein (CREB) in rat hippocampus. *The Journal of neuroscience : the*  
452 *official journal of the Society for Neuroscience*. 1996 Apr 1;16(7):2365-72.
- 453 37. Jacobsen JP, Mork A. The effect of escitalopram, desipramine, electroconvulsive seizures and  
454 lithium on brain-derived neurotrophic factor mRNA and protein expression in the rat brain and the  
455 correlation to 5-HT and 5-HIAA levels. *Brain research*. 2004 Oct 22;1024(1-2):183-92.
- 456 38. Zetterström TSC, Pei Q, Madhav TR, Coppell AL, Lewis L, Grahame-Smith DG. Manipulations of  
457 brain 5-HT levels affect gene expression for BDNF in rat brain. *Neuropharmacology*. 1999  
458 1999/07/01;38(7):1063-73.
- 459 39. Erlandsson K, Sivananthan T, Lui D, Spezzi A, Townsend CE, Mu S, et al. Measuring SSRI occupancy  
460 of SERT using the novel tracer [123I]ADAM: a SPECT validation study. *European journal of nuclear medicine*  
461 *and molecular imaging*. 2005 Nov;32(11):1329-36.
- 462 40. Baldinger P, Kranz GS, Haeusler D, Savli M, Spies M, Philippe C, et al. Regional differences in SERT  
463 occupancy after acute and prolonged SSRI intake investigated by brain PET. *NeuroImage*. 2014  
464 Mar;88:252-62.
- 465 41. Bus BA, Molendijk ML, Penninx BJ, Buitelaar JK, Kenis G, Prickaerts J, et al. Determinants of serum  
466 brain-derived neurotrophic factor. *Psychoneuroendocrinology*. 2011 Feb;36(2):228-39.
- 467 42. Molendijk ML, Haffmans JP, Bus BA, Spinhoven P, Penninx BW, Prickaerts J, et al. Serum BDNF  
468 concentrations show strong seasonal variation and correlations with the amount of ambient sunlight. *PloS*  
469 *one*. 2012;7(11):e48046.
- 470 43. Hiemke C, Bergemann N, Clement HW, Conca A, Deckert J, Domschke K, et al. Consensus  
471 Guidelines for Therapeutic Drug Monitoring in Neuropsychopharmacology: Update 2017.  
472 *Pharmacopsychiatry*. 2018 Jan;51(1-02):e1.
- 473 44. Kristensen TD, Mandl RCW, Jepsen JRM, Rostrup E, Glenthøj LB, Nordentoft M, et al. Non-  
474 pharmacological modulation of cerebral white matter organization: A systematic review of non-psychiatric  
475 and psychiatric studies. *Neuroscience and biobehavioral reviews*. 2018 May;88:84-97.

476
